# Supplementary material
Source: PubMed Central journal article supplement (PMC6935896)
Supplement: JCM.01259-19-s0001.pdf [file JCM.01259-19-s0001.pdf]

## Supplemental Tables

**Supplemental Table 1.** Frequency of Common Skin and Environmental Contaminants Detected by Panfungal PCR in Histopathology Specimens, No. (%)

| <b>Contaminant</b>                  | <b>Sites with Positive</b>      |                                 |
|-------------------------------------|---------------------------------|---------------------------------|
|                                     | <b>Histopathology</b><br>(N=95) | <b>Control Sites</b><br>(N=118) |
| <i>Malassezia</i> spp.              | 29 (30.5)                       | 33 (28.0)                       |
| <i>Aureobisidium pullulans</i>      | 2 (2.1)                         | 3 (2.5)                         |
| <i>Yarrowia lipolytica</i>          | 0                               | 1 (0.8)                         |
| <i>Talaromyces</i> spp.             | 1 (1.1)                         | 0                               |
| <i>Trichosporon asahii</i>          | 3 (3.2)                         | 0                               |
| <i>Cladospodium cladosporioides</i> | 1 (1.1)                         | 2 (1.7)                         |

**Supplemental Table 2.** Fungal Organisms Identified Using Panfungal PCR-Based Assay<sup>a</sup>

| <b>Organism</b>                   | <b>Sites with Angioinvasion<br/>(N=48)</b> | <b>Sites with Nonvascular<br/>Tissue invasion<br/>(N=47)</b> |
|-----------------------------------|--------------------------------------------|--------------------------------------------------------------|
| <i>Acrophialophora nainiana</i>   | 0                                          | 1                                                            |
| <i>Actinomucor elegans</i>        | 5                                          | 1                                                            |
| <i>Apophysomyces elegans</i>      | 3                                          | 2                                                            |
| <i>Apophysomyces variabilis</i>   | 4                                          | 1                                                            |
| <i>Aspergillus flavus/oryzae</i>  | 4                                          | 3                                                            |
| <i>Aspergillus gracilis</i>       | 1                                          | 0                                                            |
| <i>Aspergillus penicillioides</i> | 1                                          | 0                                                            |
| <i>Aspergillus tamarai</i>        | 0                                          | 0                                                            |
| <i>Aspergillus terreus</i>        | 1                                          | 1                                                            |
| <i>Aspergillus vitricola</i>      | 1                                          | 0                                                            |
| <i>Beauveria bassiana</i>         | 1                                          | 0                                                            |
| <i>Chaetomium murorum</i>         | 0                                          | 1                                                            |
| <i>Fusarium</i> spp.              | 2                                          | 1                                                            |
| <i>Fusarium equiseti</i>          | 0                                          | 1                                                            |
| <i>Fusarium solani</i>            | 0                                          | 3                                                            |
| <i>Mucor circinelloides</i>       | 1                                          | 1                                                            |
| <i>Pyrenochaetopsis</i> spp.      | 0                                          | 1                                                            |
| <i>Pythium aphanidermatum</i>     | 2                                          | 1                                                            |
| <i>Rasamsonia argillacea</i>      | 1                                          | 0                                                            |

|                                 |    |   |
|---------------------------------|----|---|
| <i>Rhizopus oryzae</i>          | 2  | 1 |
| <i>Saksenaea erythrospora</i>   | 9  | 0 |
| <i>Saksenaea trapezispora</i>   | 0  | 1 |
| <i>Saksenaea vasiformis</i>     | 20 | 4 |
| <i>Scedosporium apiospermum</i> | 0  | 1 |
| <i>Scedosporium aurantiacum</i> | 2  | 0 |
| <i>Ustilago</i> spp.            | 1  | 0 |

---

<sup>a</sup> Injury sites may have more than one fungus identified, so numbers will sum to more than the total. Contaminants detailed in Supplemental Table 1 and *Candida* spp. were excluded from the listing.

**Supplemental Table 3.** Comparison of PCR-based Assay Versus Histopathology for Identification of Fungus in Formalin-fixed Paraffin-embedded Tissue

| <b><u>PCR assay</u></b>                    | <b><u>Any Histopathology</u><sup>a,b</sup></b> |                            | <b>Total</b> |
|--------------------------------------------|------------------------------------------------|----------------------------|--------------|
|                                            | <b>Negative for any</b>                        | <b>Positive for fungal</b> |              |
|                                            | <b>fungal elements</b>                         | <b>elements</b>            |              |
|                                            | <b>(Controls)</b>                              | <b>(Cases)</b>             |              |
| <b>Negative for fungal DNA</b>             | 117                                            | 35                         | 152          |
| <b>Positive for fungal DNA<sup>c</sup></b> | 1 <sup>d</sup>                                 | 60                         | 61           |
| <b>Total</b>                               | 118                                            | 95                         | 213          |

  

|                                            | <b><u>Histopathology Restricted to Angioinvasion</u></b> |                      | <b>Total</b> |
|--------------------------------------------|----------------------------------------------------------|----------------------|--------------|
|                                            | <b><u>Subset<sup>e</sup></u></b>                         |                      |              |
|                                            | <b>Negative for</b>                                      | <b>Positive for</b>  |              |
|                                            | <b>Angioinvasion</b>                                     | <b>Angioinvasion</b> |              |
|                                            | <b>(Controls)</b>                                        | <b>(Cases)</b>       |              |
| <b>Negative for fungal DNA</b>             | 117                                                      | 8                    | 125          |
| <b>Positive for fungal DNA<sup>c</sup></b> | 1 <sup>d</sup>                                           | 40                   | 41           |
| <b>Total</b>                               | 118                                                      | 48                   | 166          |

<sup>a</sup> Includes both angioinvasion nonvascular tissue invasion.

<sup>b</sup> Kappa coefficient for comparison related to any histopathology is 0.646 (95% confidence interval: 0.546-0.745); McNemar's test p-value is <0.0001.

<sup>c</sup> Excludes skin and environmental contaminants (**Supplemental Table 1**).

<sup>d</sup> False positive is *Alternaria* spp.

<sup>e</sup> Kappa coefficient for comparison related to angioinvasion is 0.862 (95% confidence interval: 0.775-0.949); McNemar's test p-value is 0.020.

**Supplemental Table 4.** Comparison of Panfungal PCR and Semi-nested PCR<sup>a</sup>

| <b>Fungal Positivity Findings, No. (%)</b>   | <b>Panfungal<br/>Result<sup>b</sup></b> | <b>Semi-nested<br/>Result<sup>b</sup></b> | <b>Kappa Coefficient</b> |
|----------------------------------------------|-----------------------------------------|-------------------------------------------|--------------------------|
| <b>Histopathology positive specimens</b>     |                                         |                                           |                          |
|                                              | <b>62</b>                               | <b>62</b>                                 |                          |
| <b>sent to both laboratories<sup>c</sup></b> |                                         |                                           |                          |
| No fungi                                     | 15 (24.2)                               | 6 (9.7)                                   | 0.171 (-0.090, 0.432)    |
| Any fungi                                    | 47 (75.8)                               | 56 (90.3)                                 |                          |
| Fungi identified at genus level              | 47 (75.8)                               | 56 (90.3)                                 | 0.171 (-0.090, 0.432)    |
| Order Mucorales                              | 29 (46.8)                               | 41 (66.1)                                 | 0.494 (0.297, 0.692)     |
| <i>Saksenaea</i> spp. <sup>d</sup>           | 21 (33.9)                               | 15 (24.2)                                 | 0.458 (0.222, 0.694)     |
| <i>Aspergillus</i> spp.                      | 15 (24.2)                               | 28 (45.2)                                 | 0.423 (0.214, 0.631)     |
| <i>Fusarium</i> spp.                         | 5 (8.1)                                 | 8 (12.9)                                  | 0.402 (0.046, 0.759)     |
| <b>Angioinvasion specimens sent to both</b>  |                                         |                                           |                          |
|                                              | <b>37</b>                               | <b>37</b>                                 |                          |
| <b>laboratories</b>                          |                                         |                                           |                          |
| No fungi                                     | 8 (21.6)                                | 1 (2.7)                                   | 0.183 (-0.131, 0.497)    |
| Any fungi                                    | 29 (78.4)                               | 36 (97.3)                                 |                          |
| Fungi identified at genus level              | 29 (78.4)                               | 36 (97.3)                                 |                          |
| Order Mucorales                              | 22 (59.5)                               | 31 (83.8)                                 | 0.318 (0.044, 0.593)     |
| <i>Saksenaea</i> spp. <sup>d</sup>           | 17 (46.0)                               | 13 (35.1)                                 | 0.446 (0.161, 0.731)     |
| <i>Aspergillus</i> spp.                      | 8 (21.6)                                | 17 (46.0)                                 | 0.377 (0.113, 0.641)     |
| <i>Fusarium</i> spp.                         | 2 (5.4)                                 | 5 (13.5)                                  | 0.226 (-0.218, 0.670)    |

<sup>a</sup> Results in this table are presented for all specimens assessed (multiple specimens from one injury site are not collapsed for the site).

<sup>b</sup> Five true negative control specimens (surgical specimens unrelated to trauma) were also analyzed. Four were negative at both laboratories. One control specimen had a false positive for *Aspergillus* spp. with the semi-nested assays, while the panfungal assay was negative.

<sup>c</sup> Includes both angioinvasion and nonvascular tissue invasion.

<sup>d</sup> Specimens identified as *Apophysomyces elegans* were included with *Saksenaea* spp. as LADR was unable to differentiate between the two organisms in the semi-nested assays.
